# Supplementary material
Source: publisher figshare collection journal article supplement (https://springernature.figshare.com/ndownloader/files/20373411)
Supplement: Supplementary file 1 [file 20373411]

## Sheet: Feuil1
Stations	Depths	Coordinates		Habitat	Sampling method
1	0-1m	37"15.560'N	9°52'253'E	Rocky shore, Cymodocea nodosa meadow, Photophilic algae assemblage dominated by Corallina elongata and Dictyota dichotoma	Quadrat
2	10.6m	37"15.000'N	9°51.000'E	Muddy sand	Van Veen grab
3	0-1m	37''13.423'N	9°49.093'E	Rocky shore, Photophilic algae assemblage dominated by Cystoseira compressa and Padina pavonica	Quadrat
4	0-1m	37"12.112'N	9°48.059'E	C. nodosa and Zostera noltei meadows	Quadrat
5	3.5m	37''12.320N	9°48.727'E	C. nodosa meadow, photophilic algae assemblage dominated by Caulerpa prolifera	Van Veen grab
6	0-1m	37"10.631'N	9°48.103'E	C. nodosa meadow, photophilic algae assemblage dominated by C. compressa	Quadrat
7	0-1m	37"09.134'N	9°50.046'E	Rocky shore, photophilic algae assemblage dominated by Ulva lactuca and Chaetemorpha sp.	Quadrat
8	2.3m	37"09.322'N	9°48.444'E	Photophilic algae assemblage dominated by Chaetomorpha linum and U. lactuca	Quadrat
9	3.5m	37"11.500'N	9°47.400'E	C. nodosa meadow	Van Veen grab
10	8m	37"10.913’N	9°47.179’E	Muddy sand	Van Veen grab
11	10.7m	37"09.000’N	9°49.000’E	Muddy sand	Van Veen grab
12	5 m	37"10.500’N	9°48.000’E	C. nodosa meadow	Van Veen grab
13	0-1m	37"13.056'N	9°52.468'E	C. nodosa meadow, Photophilic algae assemblage dominated by Hypnea spp.	Quadrat
14	2.5m	37"09.171'N	9°49.374'E	Photophilic algae assemblage dominated by C. prolifera and Caulerpa racemosa	Van Veen grab
15	7m	37"09.500’N	9°50.000’E	Muddy sand	Van Veen grab
16	9m	37"11.000’N	9°50.000’E	Muddy sand	Van Veen grab
17	9.8m	37"12.000’N	9°50.000’E	Muddy sand	Van Veen grab
18	5m	37"13.000’N	9°49.000’E	Muddy sand	Van Veen grab
19	7.1m	37"12.000’N	9°49.000’E	C. nodosa meadow	Van Veen grab
20	2.8m	37"13.131'N	9°51.287'E	Photophilic algae assemblage dominated by Cladophora sp.	Quadrat
21	4m	37"09.410'N	9°52.250'E	Cymodocea nodosa meadow	Van Veen grab
22	5m	37"12.000'N	9°51.000'E	Muddy sand	Van Veen grab
23	8m	37"11.000'N	9°51.000'E	Muddy sand	Van Veen grab
24	6m	37"11.500'N	9°53.000'E	Muddy sand	Van Veen grab
25	3.5m	37"12.220'N	9°53.510'E	Photophilic algal assemblage dominated by Sargassum vulgare and Dictyopteris polypodioides	Van Veen grab
26	3m	37"13.270'N	9°54.000'E	Photophilic algal assemblage dominated by Hypnea spp., Codium fragile and D. polypodioides	Van Veen grab
27	0-1m	37"12.448'N	9°55.024'E	C. nodosa and Z. noltei meadows, Photophilic algae assemblage dominated by Gracilaria sp.	Quadrat
28	4.5m	37"12.120'N	9°54.430'E	Muddy sand	Van Veen grab
29	6m	37"10.330'N	9°54.000'E	C. nodosa meadow	Van Veen grab
30	0-1m	37"09.463'N	9°53.004'E	Rocky shore, photophilic algal assemblage dominated by Cladophora sp and U. lactuca	Quadrat
31	4m	37"13.000'N	9°54.000'E	C. nodosa meadow	Van Veen grab
32	2.2m	37"13.520'N	9°52.440'E	Photophilic algal assemblage dominated by U. lactuca and Chaetomorpha intestinalis	Quadrat
33	0-1m	37"10.028'N	9°55.551'E	C. nodosa and Z. noltei meadows	Quadrat
